# Supplementary material for: Analysis of the mouse gut microbiome using full-length 16S rRNA amplicon sequencing
Source: PubMed Central journal article supplement (PMC4944186; doi:10.1038/srep29681), 2016-07-14
Supplement: srep29681-s1.pdf [file srep29681-s1.pdf]

# **Analysis of the mouse gut microbiome using full-length 16S rRNA amplicon sequencing**

Jongoh Shin<sup>1,¶</sup>, Sooin Lee<sup>1,¶</sup>, Min-Jeong Go<sup>2</sup>, Sang Yup Lee<sup>3</sup>, Sun Chang Kim<sup>1,4</sup>,  
Chul-Ho Lee<sup>2</sup>, and Byung-Kwan Cho<sup>1,4,\*</sup>

<sup>1</sup>Department of Biological Sciences and KI for the BioCentury, Korea Advanced  
Institute of Science and Technology, Daejeon 34141, Republic of Korea

<sup>2</sup>Laboratory Animal Resource Center, Korea Research Institute of Bioscience and  
Biotechnology, Daejeon 34141, Republic of Korea

<sup>3</sup>Department of Chemical and Biomolecular Engineering, Korea Advanced Institute  
of Science and Technology, Daejeon 34141, Republic of Korea

<sup>4</sup>Intelligent Synthetic Biology Center, Daejeon 34141, Republic of Korea

## **Supplementary Data**

Figures S1-S4

Tables S1-S2

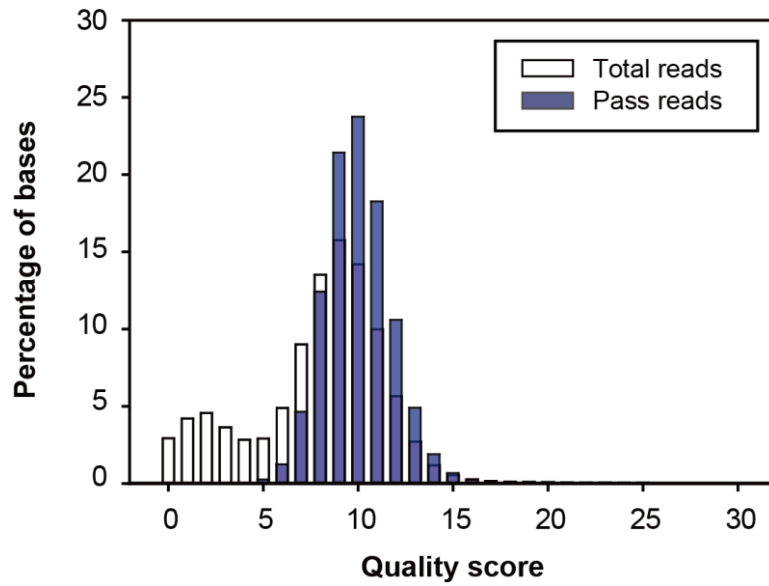

**Supplemental Figure S1. MinION™ quality score distribution.** The distribution of PHRED quality score of MinION™ raw data is plotted on X-axes and percentage of bases on Y-axes for “Total reads” and “Pass 2D reads”.

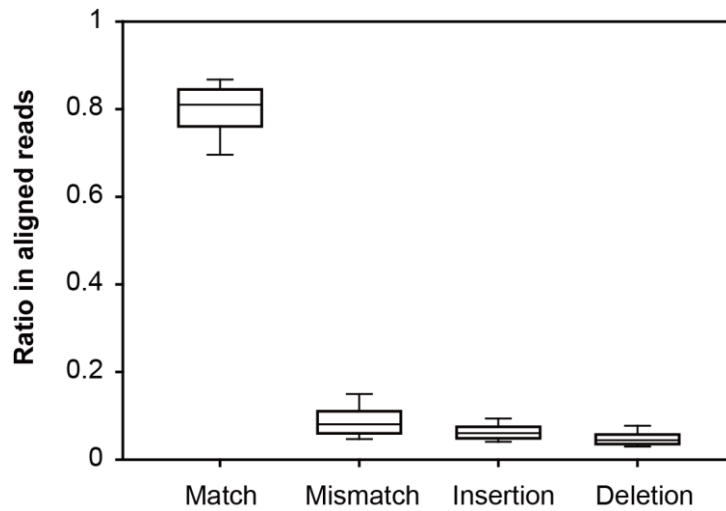

**Supplemental Figure S2. Comparison of ratios of match, mismatch, insertion and deletion.** The proportion of accuracy was 0.796 in aligned reads. Mismatch, insertion and deletion ratio in aligned reads was 0.090, 0.064 and 0.050, respectively. Box plot show interquartile range with 25<sup>th</sup> and 75<sup>th</sup> percentiles; median is the solid line in each box.

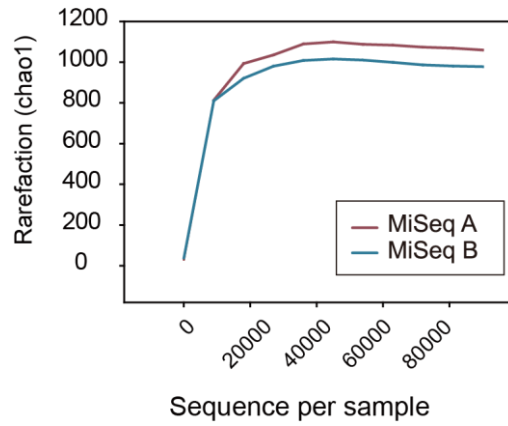

**Supplemental Figure S3. Rarefaction curves of mouse fecal samples based on Illumina MiSeq sequencing.** A total OTUs were generated by 3% distances. Total sample richness estimates were calculated by richness estimators Chao1.

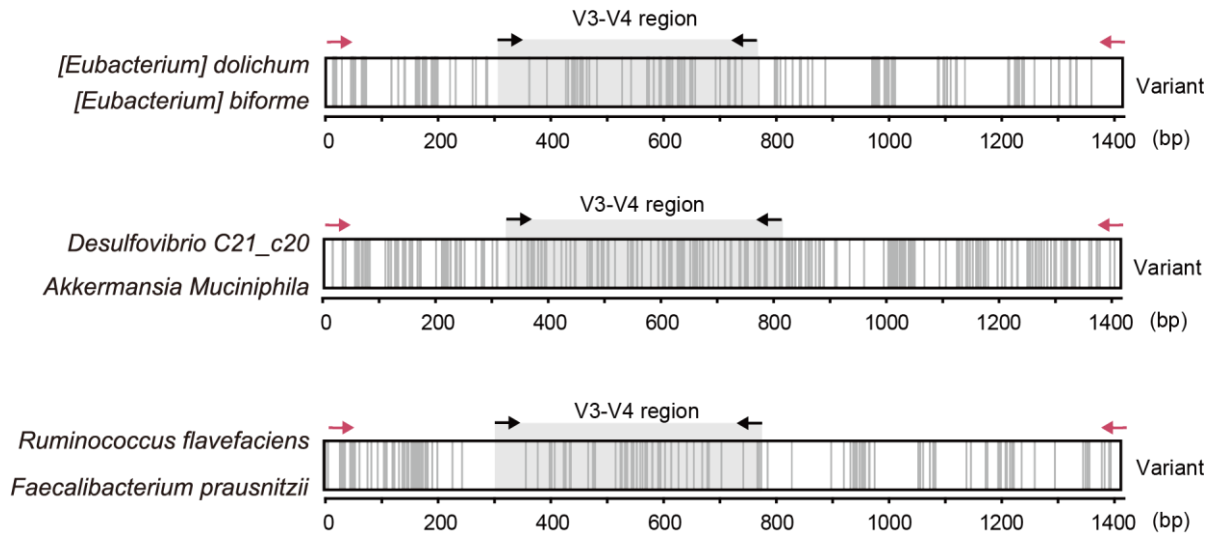

**Supplemental Figure S4. Detected variants between 16S rRNA gene sequences from two phylogenetically related species were represented with vertical line on 16s rDNA sequences.** Variants were defined as nucleotide presents in less than 50% of aligned position frequency. The black and red arrow indicates binding position of primer sets for the amplification of V3–V4 regions and nearly full-regions on 16s rDNA sequences, respectively.

**Supplemental Table S1. Relative abundance of phylotypes detected by MiSeq sequencer.**

| Taxonomy                                                                                                       | MiSeq<br>A (%) | MiSeq<br>B (%) |
|----------------------------------------------------------------------------------------------------------------|----------------|----------------|
| k__Bacteria;p__Bacteroidetes;c__Bacteroidia;o__Bacteroidales;f__S24-7;                                         | 32.808         | 25.582         |
| k__Bacteria;p__Firmicutes;c__Clostridia;o__Clostridiales;                                                      | 20.494         | 25.279         |
| k__Bacteria;p__Firmicutes;c__Erysipelotrichi;o__Erysipelotrichales;f__Erysipelotrichaceae;g__Allobaculum;      | 5.421          | 10.833         |
| k__Bacteria;p__Bacteroidetes;c__Bacteroidia;o__Bacteroidales;f__Bacteroidaceae;g__Bacteroides;s__acidifaciens; | 5.105          | 2.504          |
| k__Bacteria;p__Bacteroidetes;c__Bacteroidia;o__Bacteroidales;f__Rikenellaceae;                                 | 4.244          | 4.329          |
| k__Bacteria;p__Proteobacteria;c__Betaproteobacteria;o__Burkholderiales;f__Alcaligenaceae;g__Sutterella;        | 3.627          | 4.076          |
| k__Bacteria;p__Cyanobacteria;c__4C0d-2;o__YS2;                                                                 | 3.531          | 0.774          |
| k__Bacteria;p__Firmicutes;c__Bacilli;o__Lactobacillales;f__Lactobacillaceae;g__Lactobacillus;                  | 3.195          | 5.372          |
| k__Bacteria;p__Actinobacteria;c__Actinobacteria;o__Bifidobacteriales;f__Bifidobacteriaceae;g__Bifidobacterium; | 2.257          | 2.109          |
| k__Bacteria;p__Firmicutes;c__Clostridia;o__Clostridiales;f__Lachnospiraceae;g__[Ruminococcus];s__gnavus;       | 2.064          | 1.149          |
| k__Bacteria;p__Firmicutes;c__Clostridia;o__Clostridiales;f__Lachnospiraceae;                                   | 1.962          | 1.819          |
| k__Bacteria;p__Firmicutes;c__Clostridia;o__Clostridiales;f__Ruminococcaceae;g__Oscillospira;                   | 1.864          | 1.554          |
| k__Bacteria;p__Firmicutes;c__Bacilli;o__Turicibacterales;f__Turicibacteraceae;g__Turicibacter;                 | 1.510          | 1.282          |
| k__Bacteria;p__Bacteroidetes;c__Bacteroidia;o__Bacteroidales;f__Porphyromonadaceae;g__Parabacteroides;         | 1.429          | 0.510          |
| k__Bacteria;p__Firmicutes;c__Clostridia;o__Clostridiales;f__Ruminococcaceae;                                   | 1.383          | 1.257          |

| Taxonomy                                                                                                                       | MiSeq | MiSeq |
|--------------------------------------------------------------------------------------------------------------------------------|-------|-------|
|                                                                                                                                | A (%) | B (%) |
| k__Bacteria;p__Actinobacteria;c__Coriobacteriia;o__Coriobacteriales;f__Coriobacteriaceae;                                      | 1.125 | 1.272 |
| k__Bacteria;p__Firmicutes;c__Clostridia;o__Clostridiales;f__Ruminococcaceae;g__Ruminococcus;s__flavefaciens;                   | 1.077 | 0.149 |
| k__Bacteria;p__Firmicutes;c__Clostridia;o__Clostridiales;f__Lachnospiraceae;                                                   | 0.901 | 1.195 |
| k__Bacteria;p__Firmicutes;c__Clostridia;o__Clostridiales;f__Lachnospiraceae;g__Coproccoccus;                                   | 0.738 | 0.714 |
| k__Bacteria;p__Firmicutes;c__Erysipelotrichi;o__Erysipelotrichales;f__Erysipelotrichaceae;                                     | 0.717 | 0.123 |
| k__Bacteria;p__Tenericutes;c__Mollicutes;o__Anaeroplasmatales;f__Anaeroplasmataceae;g__Anaeroplasmata;                         | 0.673 | 0.103 |
| k__Bacteria;p__Firmicutes;c__Clostridia;o__Clostridiales;f__Ruminococcaceae;g__Ruminococcus;                                   | 0.463 | 0.745 |
| Unassigned;                                                                                                                    | 0.416 | 0.268 |
| k__Bacteria;p__Firmicutes;c__Clostridia;o__Clostridiales;f__Lachnospiraceae;g__Anaerostipes;                                   | 0.413 | 0.106 |
| k__Bacteria;p__Firmicutes;c__Clostridia;o__Clostridiales;f__Lachnospiraceae;g__Dorea;                                          | 0.337 | 0.512 |
| k__Bacteria;p__Firmicutes;c__Erysipelotrichi;o__Erysipelotrichales;f__Erysipelotrichaceae;g__Coproccoccus;                     | 0.303 | 0.005 |
| k__Bacteria;p__TM7;c__TM7-3;o__CW040;f__F16;                                                                                   | 0.276 | 0.220 |
| k__Bacteria;p__Verrucomicrobia;c__Verrucomicrobiae;o__Verrucomicrobiales;f__Verrucomicrobiaceae;g__Akkermansia;s__muciniphila; | 0.273 | 4.733 |
| k__Bacteria;p__Tenericutes;c__Mollicutes;o__RF39;                                                                              | 0.252 | 0.162 |
| k__Bacteria;p__Firmicutes;c__Clostridia;o__Clostridiales;f__Dehalobacteriaceae;g__Dehalobacterium;                             | 0.238 | 0.109 |
| k__Bacteria;p__Firmicutes;c__Clostridia;o__Clostridiales;f__Peptococcaceae;g__                                                 | 0.154 | 0.002 |

| <b>Taxonomy</b>                                                                                                     | <b>MiSeq<br/>A (%)</b> | <b>MiSeq<br/>B (%)</b> |
|---------------------------------------------------------------------------------------------------------------------|------------------------|------------------------|
| _rc4-4;                                                                                                             |                        |                        |
| k__Bacteria;p__Proteobacteria;c__Alphaproteobacteria;o__RF32;                                                       | 0.140                  | 0.037                  |
| k__Bacteria;p__Firmicutes;c__Clostridia;o__Clostridiales;f__Clostridiaceae;g__Clostridium;                          | 0.104                  | 0.250                  |
| k__Bacteria;p__Firmicutes;c__Bacilli;o__Lactobacillales;f__Lactobacillaceae;g__Lactobacillus;s__reuteri;            | 0.086                  | 0.085                  |
| k__Bacteria;p__Proteobacteria;c__Alphaproteobacteria;                                                               | 0.061                  | 0.020                  |
| k__Bacteria;p__Actinobacteria;c__Coriobacteriia;o__Coriobacteriales;f__Coriobacteriaceae;g__Adlercreutzia;          | 0.044                  | 0.210                  |
| k__Bacteria;p__Proteobacteria;c__Deltaproteobacteria;o__Desulfovibrionales;f__Desulfovibrionaceae;g__Desulfovibrio; | 0.043                  | 0.322                  |
| k__Bacteria;p__Firmicutes;c__Clostridia;o__Clostridiales;f__Peptococcaceae;                                         | 0.035                  | 0.004                  |
| k__Bacteria;p__Firmicutes;c__Clostridia;o__Clostridiales;                                                           | 0.034                  | 0.031                  |
| k__Bacteria;p__Firmicutes;c__Clostridia;o__Clostridiales;f__Clostridiaceae;                                         | 0.033                  | 0.015                  |
| k__Bacteria;p__Firmicutes;c__Clostridia;o__Clostridiales;f__Christensenellaceae;                                    | 0.031                  | 0.007                  |
| k__Bacteria;p__Firmicutes;c__Clostridia;o__Clostridiales;f__[Mogibacteriaceae];                                     | 0.025                  | 0.025                  |
| k__Bacteria;p__Firmicutes;c__Clostridia;o__Clostridiales;f__Clostridiaceae;g__Clostridium;s__perfringens;           | 0.024                  | 0.004                  |
| k__Bacteria;p__Firmicutes;c__Clostridia;o__Clostridiales;f__Clostridiaceae;g__Clostridium;andidatus Arthromitus;    | 0.022                  | 0.029                  |
| k__Bacteria;p__Bacteroidetes;c__Bacteroidia;o__Bacteroidales;f__Bacteroidaceae;g__Bacteroides;                      | 0.018                  | 0.013                  |
| k__Bacteria;p__Actinobacteria;c__Actinobacteria;o__Bifidobacteriales;f__Bifidobacteriaceae;g__Bifidobacterium;      | 0.017                  | 0.004                  |
| k__Bacteria;p__Firmicutes;                                                                                          | 0.007                  | 0.003                  |
| k__Bacteria;p__Actinobacteria;c__Actinobacteria;o__Bifidobacteriales;f__Bifidobacteriaceae;                         | 0.006                  | 0.011                  |



| Taxonomy                                                                                                       | MiSeq | MiSeq |
|----------------------------------------------------------------------------------------------------------------|-------|-------|
|                                                                                                                | A (%) | B (%) |
| acteriaceae;g__Bifidobacterium;s__pseudolongum;                                                                |       |       |
| k__Bacteria;p__Bacteroidetes;c__Bacteroidia;o__Bacteroidales;f__Bacteroidaceae;g__Bacteroides;                 | 0.003 | 0.007 |
| k__Bacteria;p__Firmicutes;c__Clostridia;o__Clostridiales;f__Eubacteriaceae;g__Anaerofustis;                    | 0.003 | 0.000 |
| k__Bacteria;p__Firmicutes;c__Clostridia;o__Clostridiales;f__Lachnospiraceae;g__Blautia;                        | 0.003 | 0.000 |
| k__Bacteria;p__Proteobacteria;c__Betaproteobacteria;                                                           | 0.003 | 0.003 |
| k__Bacteria;p__Bacteroidetes;c__Bacteroidia;o__Bacteroidales;f__Bacteroidaceae;g__Bacteroides;s__ovatus;       | 0.002 | 0.000 |
| k__Bacteria;p__Cyanobacteria;c__Chloroplast;o__Streptophyta;                                                   | 0.002 | 0.007 |
| k__Bacteria;p__Firmicutes;c__Clostridia;o__Clostridiales;f__Christensenellaceae;g__Christensenella;            | 0.002 | 0.003 |
| k__Bacteria;p__Proteobacteria;c__Alphaproteobacteria;o__Rickettsiales;f__mitochondria;                         | 0.002 | 0.025 |
| k__Bacteria;p__Proteobacteria;c__Gammaproteobacteria;o__Enterobacteriales;f__Enterobacteriaceae;               | 0.002 | 0.009 |
| k__Bacteria;p__Actinobacteria;c__Actinobacteria;o__Actinomycetales;f__Pseudonocardiaceae;g__Actinomycetospora; | 0.000 | 0.002 |
| k__Bacteria;p__Actinobacteria;c__Actinobacteria;o__Bifidobacteriales;f__Bifidobacteriaceae;                    | 0.000 | 0.002 |
| k__Bacteria;p__Firmicutes;c__Bacilli;o__Lactobacillales;f__Streptococcaceae;g__Streptococcus;                  | 0.000 | 0.002 |
| k__Bacteria;p__Proteobacteria;c__Alphaproteobacteria;o__Rhizobiales;f__Methylobacteriaceae;                    | 0.000 | 0.002 |
| k__Bacteria;p__Proteobacteria;c__Alphaproteobacteria;o__Sphingomonadales;f__Sphingomonadaceae;                 | 0.000 | 0.002 |

| <b>Taxonomy</b>                                                                                                            | <b>MiSeq</b> | <b>MiSeq</b> |
|----------------------------------------------------------------------------------------------------------------------------|--------------|--------------|
|                                                                                                                            | <b>A (%)</b> | <b>B (%)</b> |
| k__Bacteria;p__Proteobacteria;c__Alphaproteobacteria;o__Sphingomonadales;f__Sphingomonadaceae;g__Sphingomonas;             | 0.000        | 0.010        |
| k__Bacteria;p__Proteobacteria;c__Gammaproteobacteria;o__Pseudomonadales;f__Moraxellaceae;g__Acinetobacter;                 | 0.000        | 0.004        |
| k__Bacteria;p__Proteobacteria;c__Gammaproteobacteria;o__Pseudomonadales;f__Moraxellaceae;g__Acinetobacter;s__rhizosphaerae | 0.000        | 0.002        |
| k__Bacteria;p__Proteobacteria;c__Gammaproteobacteria;o__Xanthomonadales;f__Xanthomonadaceae;                               | 0.000        | 0.002        |

**Supplemental Table S2. Relative abundance of phylotypes detected by MinION™ sequencer.**

| Taxonomy                                                                                                       | MinION<br>A (%) | MinION<br>B (%) |
|----------------------------------------------------------------------------------------------------------------|-----------------|-----------------|
| k__Bacteria;p__Bacteroidetes;c__Bacteroidia;o__Bacteroidales;f__S24-7;                                         | 57.640          | 56.168          |
| k__Bacteria;p__Firmicutes;c__Clostridia;o__Clostridiales;                                                      | 10.641          | 11.355          |
| k__Bacteria;p__Firmicutes;c__Erysipelotrichi;o__Erysipelotrichales;f__Erysipelotrichaceae;g__Allobaculum;      | 7.750           | 8.692           |
| k__Bacteria;p__Firmicutes;c__Bacilli;o__Lactobacillales;f__Lactobacillaceae;g__Lactobacillus;                  | 3.166           | 2.944           |
| k__Bacteria;p__Bacteroidetes;c__Bacteroidia;o__Bacteroidales;f__Bacteroidaceae;g__Bacteroides;s__acidifaciens; | 2.172           | 2.383           |
| k__Bacteria;p__Proteobacteria;c__Betaproteobacteria;o__Burkholderiales;f__Alcaligenaceae;g__Sutterella;        | 1.970           | 2.103           |
| k__Bacteria;p__Bacteroidetes;c__Bacteroidia;o__Bacteroidales;f__Rikenellaceae;                                 | 1.491           | 1.636           |
| k__Bacteria;p__Firmicutes;c__Clostridia;o__Clostridiales;f__Lachnospiraceae;                                   | 1.473           | 1.822           |
| k__Bacteria;p__Tenericutes;c__Mollicutes;o__RF39;                                                              | 1.178           | 1.028           |
| k__Bacteria;p__Cyanobacteria;c__4C0d-2;o__YS2;                                                                 | 1.141           | 1.308           |
| k__Bacteria;p__Firmicutes;c__Clostridia;o__Clostridiales;f__Lachnospiraceae;g__[Ruminococcus];s__gnavus;       | 1.049           | 0.841           |
| k__Bacteria;p__Firmicutes;c__Clostridia;o__Clostridiales;f__Ruminococcaceae;g__Oscillospira;                   | 0.773           | 0.607           |
| k__Bacteria;p__Firmicutes;c__Clostridia;o__Clostridiales;f__Ruminococcaceae;g__Ruminococcus;s__flavefaciens;   | 0.736           | 0.654           |
| k__Bacteria;p__Firmicutes;c__Bacilli;o__Turicibacterales;f__Turicibacteraceae;g__Turicibacter;                 | 0.681           | 0.561           |
| k__Bacteria;p__Bacteroidetes;c__Bacteroidia;o__Bacteroidales;f__Bacteroidaceae;g__Bacteroides;                 | 0.681           | 0.374           |

| Taxonomy                                                                                                                       | MinION | MinION |
|--------------------------------------------------------------------------------------------------------------------------------|--------|--------|
|                                                                                                                                | A (%)  | B (%)  |
| k__Bacteria;p__Firmicutes;c__Clostridia;o__Clostridiales;f__Lachnospiraceae;g__Dorea;                                          | 0.663  | 0.794  |
| k__Bacteria;p__Proteobacteria;c__Alphaproteobacteria;                                                                          | 0.663  | 0.607  |
| k__Bacteria;p__Bacteroidetes;c__Bacteroidia;o__Bacteroidales;f__Porphyromonadaceae;g__Parabacteroides;                         | 0.626  | 0.561  |
| k__Bacteria;p__Firmicutes;c__Clostridia;o__Clostridiales;f__Ruminococcaceae;                                                   | 0.571  | 0.841  |
| k__Bacteria;p__Actinobacteria;c__Actinobacteria;o__Bifidobacteriales;f__Bifidobacteriaceae;g__Bifidobacterium;                 | 0.552  | 0.701  |
| k__Bacteria;p__Actinobacteria;c__Coriobacteriia;o__Coriobacteriales;f__Coriobacteriaceae;                                      | 0.534  | 0.701  |
| k__Bacteria;p__Proteobacteria;c__Alphaproteobacteria;o__RF32;                                                                  | 0.479  | 0.607  |
| k__Bacteria;p__Firmicutes;c__Erysipelotrichi;o__Erysipelotrichales;f__Erysipelotrichaceae;                                     | 0.460  | 0.280  |
| k__Bacteria;p__Firmicutes;c__Clostridia;o__Clostridiales;f__Lachnospiraceae;g__Coprococcus;                                    | 0.368  | 0.327  |
| k__Bacteria;p__Actinobacteria;c__Actinobacteria;o__Bifidobacteriales;f__Bifidobacteriaceae;g__Bifidobacterium;s__pseudolongum; | 0.350  | 0.280  |
| k__Bacteria;p__Firmicutes;c__Clostridia;o__Clostridiales;f__Ruminococcaceae;g__Ruminococcus;                                   | 0.313  | 0.421  |
| k__Bacteria;p__Firmicutes;c__Clostridia;o__Clostridiales;f__Lachnospiraceae;g__Anaerostipes;                                   | 0.221  | 0.234  |
| k__Bacteria;p__TM7;c__TM7-3;o__CW040;f__F16;                                                                                   | 0.203  | 0.280  |
| k__Bacteria;p__Bacteroidetes;c__Bacteroidia;o__Bacteroidales;                                                                  | 0.184  | 0.000  |
| k__Bacteria;p__Tenericutes;c__Mollicutes;o__Anaeroplasmatales;f__Anaeroplasmataceae;g__Anaeroplasma;                           | 0.147  | 0.000  |
| k__Bacteria;p__Firmicutes;c__Clostridia;o__Clostridiales;f__Dehalobacteriaceae;g__Dehalobacterium;                             | 0.147  | 0.093  |

| Taxonomy                                                                                                                       | MinION | MinION |
|--------------------------------------------------------------------------------------------------------------------------------|--------|--------|
|                                                                                                                                | A (%)  | B (%)  |
| k__Bacteria;p__Firmicutes;c__Clostridia;o__Clostridiales;f__Peptococcaceae;g__rc4-4;                                           | 0.129  | 0.140  |
| k__Bacteria;p__Firmicutes;c__Erysipelotrichi;o__Erysipelotrichales;f__Erysipelotrichaceae;g__Coprobacillus;                    | 0.110  | 0.187  |
| k__Bacteria;p__Firmicutes;c__Clostridia;o__Clostridiales;f__Lachnospiraceae;g__Blautia;                                        | 0.092  | 0.093  |
| k__Bacteria;p__Firmicutes;c__Bacilli;o__Bacillales;f__Bacillaceae;g__Bacillus;                                                 | 0.074  | 0.000  |
| k__Bacteria;p__Bacteroidetes;c__Bacteroidia;o__Bacteroidales;f__Prevotellaceae;g__Prevotella;s__copri;                         | 0.055  | 0.000  |
| k__Bacteria;p__Firmicutes;c__Clostridia;o__Clostridiales;f__Lachnospiraceae;g__[Ruminococcus];                                 | 0.055  | 0.000  |
| k__Bacteria;p__Actinobacteria;c__Actinobacteria;o__Bifidobacteriales;f__Bifidobacteriaceae;g__Bifidobacterium;s__animalis;     | 0.055  | 0.000  |
| k__Bacteria;p__Bacteroidetes;c__Bacteroidia;o__Bacteroidales;f__Porphyromonadaceae;g__Parabacteroides;s__distasonis;           | 0.055  | 0.000  |
| k__Bacteria;p__Proteobacteria;c__Deltaproteobacteria;o__Desulfovibrionales;f__Desulfovibrionaceae;g__Desulfovibrio;s__C21_c20; | 0.055  | 0.000  |
| k__Bacteria;p__Firmicutes;c__Clostridia;o__Clostridiales;f__Ruminococcaceae;g__Faecalibacterium;s__prausnitzii;                | 0.037  | 0.000  |
| k__Bacteria;p__Bacteroidetes;c__Bacteroidia;o__Bacteroidales;f__Prevotellaceae;g__Prevotella;                                  | 0.037  | 0.000  |
| k__Bacteria;p__Firmicutes;c__Erysipelotrichi;o__Erysipelotrichales;f__Erysipelotrichaceae;g__[Eubacterium];s__dolichum;        | 0.037  | 0.000  |
| k__Bacteria;p__Firmicutes;c__Bacilli;o__Lactobacillales;f__Lactobacillaceae;g__Lactobacillus;s__reuteri;                       | 0.037  | 0.000  |
| k__Bacteria;p__Firmicutes;c__Clostridia;o__Clostridiales;f__Clostridiaceae;g__Clostridium;                                     | 0.037  | 0.187  |

| <b>Taxonomy</b>                                                                                                                | <b>MinION<br/>A (%)</b> | <b>MinION<br/>B (%)</b> |
|--------------------------------------------------------------------------------------------------------------------------------|-------------------------|-------------------------|
| k__Bacteria;p__Bacteroidetes;c__Bacteroidia;o__Bacteroidales;f__Bacteroidaceae;g__Bacteroides;s__ovatus;                       | 0.037                   | 0.000                   |
| k__Bacteria;p__Verrucomicrobia;c__Verrucomicrobiae;o__Verrucomicrobiales;f__Verrucomicrobiaceae;g__Akkermansia;s__muciniphila; | 0.037                   | 0.093                   |
| k__Bacteria;p__Firmicutes;c__Erysipelotrichi;o__Erysipelotrichales;f__Erysipelotrichaceae;g__[Eubacterium];s__biforme;         | 0.037                   | 0.000                   |
| k__Bacteria;p__Firmicutes;c__Clostridia;o__Clostridiales;f__[Mogibacteriaceae];                                                | 0.000                   | 0.093                   |
